# Supplementary material
Source: MDPI journal article supplement (https://www.mdpi.com/2220-9964/8/12/586)
Supplement: s1 [file s1]

## Article

# Relevance of the cell neighborhood size in landscape metrics evaluation and FOSS implementations - list of papers for the literature review

Paolo Zatelli <sup>1,\*</sup> , Stefano Gobbi <sup>1,2,3</sup>, Clara Tattoni <sup>1,8</sup> , Maria Giulia Cantiani <sup>1</sup>, Nicola La Porta <sup>2,3</sup> , Duccio Rocchini <sup>4,5,6,7</sup> , Nicola Zorzi <sup>1</sup>, and Marco Ciolli <sup>1,4</sup> 

<sup>1</sup> Department of Civil, Environmental and Mechanical Engineering, University of Trento, Via Mesiano 77, 38123, Trento, Italy; stefano.gobbi@unitn.it (S.G.); giulia.cantiani@unitn.it (G.C.); marco.ciolli@unitn.it (M.C.); clara.tattoni@unitn.it (C.T.)

<sup>2</sup> Fondazione Edmund Mach, Research and Innovation Centre, Centro di Ricerca e Innovazione, Via E. Mach 1, 38010 S. Michele all'Adige (TN), Italy; nicola.laporta@fmach.it

<sup>3</sup> The EFI Project Centre on Mountain Forests (MOUNTFOR), Edmund Mach Foundation, , Via E. Mach 1, 38010 S. Michele all'Adige (TN), Italy

<sup>4</sup> C3A, Center Agriculture Food Environment, University of Trento, Via E. Mach 1, 38010 S. Michele all'Adige (TN), Italy; duccio.rocchini@unitn.it

<sup>5</sup> Department of Cellular, Computational and Integrative Biology (CIBIO), University of Trento, Via Sommarive, 9, 38123 Povo (TN), Italy

<sup>6</sup> Fondazione Edmund Mach, Research and Innovation Centre, Department of Biodiversity and Molecular Ecology, Via E. Mach 1, 38010 S. Michele all'Adige (TN), Italy

<sup>7</sup> Czech University of Life Sciences Prague, Faculty of Environmental Sciences, Department of Applied Geoinformatics and Spatial Planning, Kamýcká 129, Praha - Suchbát, 16500, Czech Republic

<sup>8</sup> Dipartimento di Scienze e Tecnologie Agrarie, Alimentari, Ambientali e Forestali, University of Florence, Piazzale delle Cascine, 18, 50144, Firenze, Italy

\* Correspondence: paolo.zatelli@unitn.it

Version November 21, 2019 submitted to ISPRS Int. J. Geo-Inf.

## 1 Papers examined during the literature review

2 Table 1 lists the papers citing each software used for the evaluation of landscape metrics. Note  
3 that papers [1] and [62] cite both FRAGSTATS and other software.

| Software          | Number of citing papers | Citing papers |
|-------------------|-------------------------|---------------|
| FRAGSTATS         | 70                      | [1–70]        |
| QGIS (LecoS)      | 16                      | [71–86]       |
| GRASS (r.li/r.le) | 4                       | [87–90]       |
| Other             | 3                       | [1,62,91]     |
| New software      | 2                       | [92,93]       |

**Table 1.** Number and reference of papers in the analyzed set by cited software.

4 See Literature\_review.pdf for a breakdown of the landscape metrics cited by each paper.

## 5 References

- 6 1. Penghua, Q.; Songjun, X.; Genzong, X.; Benan, T.; Hua, B.; Longshi, Y. Analysis of the ecological  
7 vulnerability of the western Hainan Island based on its landscape pattern and ecosystem sensitivity. *Acta*  
8 *Ecologica Sinica* **2007**, *27*, 1257–1264. doi:10.1016/S1872-2032(07)60026-2.

2. Li, E.; Endter-Wada, J.; Li, S. Dynamics of Utah's agricultural landscapes in response to urbanization: A comparison between irrigated and non-irrigated agricultural lands. *Applied Geography* **2019**, *105*, 58–72. doi:10.1016/j.apgeog.2019.02.006.
3. Bartesaghi Koc, C.; Osmond, P.; Peters, A. Evaluating the cooling effects of green infrastructure: A systematic review of methods, indicators and data sources. *Solar Energy* **2018**, *166*, 486–508. doi:10.1016/j.solener.2018.03.008.
4. Zang, Z.; Zou, X.; Zuo, P.; Song, Q.; Wang, C.; Wang, J. Impact of landscape patterns on ecological vulnerability and ecosystem service values: An empirical analysis of Yancheng Nature Reserve in China. *Ecological Indicators* **2017**, *72*, 142–152. doi:10.1016/j.ecolind.2016.08.019.
5. Dumas, E.; Jappiot, M.; Tatoni, T. Mediterranean urban-forest interface classification (MUFIC): A quantitative method combining SPOT5 imagery and landscape ecology indices. *Landscape and Urban Planning* **2008**, *84*, 183–190. doi:10.1016/j.landurbplan.2007.12.002.
6. Keane, R.E.; McKenzie, D.; Falk, D.A.; Smithwick, E.A.; Miller, C.; Kellogg, L.K.B. Representing climate, disturbance, and vegetation interactions in landscape models. *Ecological Modelling* **2015**, *309–310*, 33–47. doi:10.1016/j.ecolmodel.2015.04.009.
7. Roy, D.; Lees, M.H.; Palavalli, B.; Pfeffer, K.; Sloom, M.A. The emergence of slums: A contemporary view on simulation models. *Environmental Modelling and Software* **2014**, *59*, 76–90. doi:10.1016/j.envsoft.2014.05.004.
8. Mallinis, G.; Emmanoloudis, D.; Giannakopoulos, V.; Maris, F.; Koutsias, N. Mapping and interpreting historical land cover/land use changes in a Natura 2000 site using earth observational data: The case of Nestos delta, Greece. *Applied Geography* **2011**, *31*, 312–320. doi:10.1016/j.apgeog.2010.07.002.
9. Baldwin, D.J.; Weaver, K.; Schneckeburger, F.; Perera, A.H. Sensitivity of landscape pattern indices to input data characteristics on real landscapes: Implications for their use in natural disturbance emulation. *Landscape Ecology* **2004**, *19*, 255–271. doi:10.1023/B:LAND.0000030442.96122.ef.
10. Fischer, J.; Lindenmayer, D.L. Beyond fragmentation: The continuum model for fauna research and conservation in human-modified landscapes. *Oikos* **2006**, *112*, 473–480. doi:10.1111/j.0030-1299.2006.14148.x.
11. Buyantuyev, A.; Wu, J. Effects of thematic resolution on landscape pattern analysis. *Landscape Ecology* **2007**, *22*, 7–13. doi:10.1007/s10980-006-9010-5.
12. Gao, J.; Li, S. Detecting spatially non-stationary and scale-dependent relationships between urban landscape fragmentation and related factors using Geographically Weighted Regression. *Applied Geography* **2011**, *31*, 292–302. doi:10.1016/j.apgeog.2010.06.003.
13. Wu, J. Effects of changing scale on landscape pattern analysis: Scaling relations. *Landscape Ecology* **2004**, *19*, 125–138. doi:10.1023/B:LAND.0000021711.40074.ae.
14. Zhang, S.; Yang, H.; Singh, L. The behavior of landscape metrics commonly used in the study of habitat fragmentation. *Landscape Ecology* **1998**, *1225*, 41–42, [arXiv:arXiv:astro-ph/0005074v1]. doi:10.1023/A.
15. Šimová, P.; Gdulová, K. Landscape indices behavior: A review of scale effects. *Applied Geography* **2012**, *34*, 385–394. doi:10.1016/j.apgeog.2012.01.003.
16. Evelin, U.; Marc, A.; Juri, R.; Riho, M.; M. Landscape Metrics and Indices: An Overview of Their Use in Landscape Research. *Living Reviews in Landscape Research* **2009**, *3*, 1–28.
17. Moser, D.; Zechmeister, H.G.; Plutzer, C.; Sauberer, N.; Wrba, T.; Grabherr, G. Landscape patch shape complexity as an effective measure for plant species richness in rural landscapes. *Landscape Ecology* **2002**, *17*, 657–669. doi:10.1023/A:1021513729205.
18. Kelly, M.; Tuxen, K.A.; Stralberg, D. Mapping changes to vegetation pattern in a restoring wetland: Finding pattern metrics that are consistent across spatial scale and time. *Ecological Indicators* **2011**, *11*, 263–273. doi:10.1016/j.ecolind.2010.05.003.
19. Buyantuyev, A.; Wu, J.; Gries, C. Multiscale analysis of the urbanization pattern of the Phoenix metropolitan landscape of USA: Time, space and thematic resolution. *Landscape and Urban Planning* **2010**, *94*, 206–217. doi:10.1016/j.landurbplan.2009.10.005.
20. Cushman, S.; States, U.; Service, F.; Mount, R. Behavior of class-level landscape metrics across gradients of class aggregation and area. *Landscape Ecology* **2015**, pp. 435–455. doi:10.1023/B.
21. Lee, S.W.; Lee, M.B.; Lee, Y.G.; Won, M.S.; Kim, J.J.; Kwon Hong, S. Relationship between landscape structure and burn severity at the landscape and class levels in Samchuck, South Korea. *Forest Ecology and Management* **2009**, *258*, 1594–1604. doi:10.1016/j.foreco.2009.07.017.

22. Pôças, I.; Cunha, M.; Pereira, L.S. Remote sensing based indicators of changes in a mountain rural landscape of Northeast Portugal. *Applied Geography* **2011**, *31*, 871–880. doi:10.1016/j.apgeog.2011.01.014.
23. Uuemaa, E.; Roosaare, J.; Mander, Ü. Scale dependence of landscape metrics and their indicatory value for nutrient and organic matter losses from catchments. *Ecological Indicators* **2005**, *5*, 350–369. doi:10.1016/j.ecolind.2005.03.009.
24. Saura, S.; Castro, S. Scaling functions for landscape pattern metrics derived from remotely sensed data: Are their subpixel estimates really accurate? *ISPRS Journal of Photogrammetry and Remote Sensing* **2007**, *62*, 201–216. doi:10.1016/j.isprsjprs.2007.03.004.
25. Shen, W.; Jenerette, G.D.; Wu, J.; Gardner, R.H. Evaluating empirical scaling relations of pattern metrics with simulated landscapes. *Ecography* **2004**, *27*, 459–469. doi:10.1111/j.0906-7590.2004.03799.x.
26. Bailey, D.; Herzog, F.; Augenstein, I.; Aviron, S.; Billeter, R.; Szerencsits, E.; Baudry, J. Thematic resolution matters: Indicators of landscape pattern for European agro-ecosystems. *Ecological Indicators* **2007**, *7*, 692–709. doi:10.1016/j.ecolind.2006.08.001.
27. Tanner, E.P.; Fuhlendorf, S.D. Impact of an agri-environmental scheme on landscape patterns. *Ecological Indicators* **2018**, *85*, 956–965. doi:10.1016/j.ecolind.2017.11.043.
28. Cushman, S.A.; McGarigal, K.; Neel, M.C. Parsimony in landscape metrics: Strength, universality, and consistency. *Ecological Indicators* **2008**, *8*, 691–703. doi:10.1016/j.ecolind.2007.12.002.
29. Kim, H.W.; Park, Y. Urban green infrastructure and local flooding: The impact of landscape patterns on peak runoff in four Texas MSAs. *Applied Geography* **2016**, *77*, 72–81. doi:10.1016/j.apgeog.2016.10.008.
30. Grilli, M.P. An area-wide model approach for the management of a disease vector planthopper in an extensive agricultural system. *Ecological Modelling* **2008**, *213*, 308–318. doi:10.1016/j.ecolmodel.2007.12.004.
31. Luck, M.; Wu, J. A gradient analysis of urban landscape pattern: A case study from the Phoenix metropolitan region, Arizona, USA. *Landscape Ecology* **2002**, *17*, 327–339. doi:10.1023/A:1020512723753.
32. Agner, H.E.H.W. Spatial analysis of landscapes: concepts and statistics. *Ecology* **2005**, *86*, 1975–1987.
33. Yeh, C.T.; Huang, S.L. Investigating spatiotemporal patterns of landscape diversity in response to urbanization. *Landscape and Urban Planning* **2009**, *93*, 151–162. doi:10.1016/j.landurbplan.2009.07.002.
34. Mears, M.; Brindley, P.; Jorgensen, A.; Ersoy, E.; Maheswaran, R. Greenspace spatial characteristics and human health in an urban environment: An epidemiological study using landscape metrics in Sheffield, UK. *Ecological Indicators* **2019**, *106*, 105464. doi:10.1016/j.ecolind.2019.105464.
35. Zhang, W.; He, Q.; Wang, H.; Cao, K.; He, S. Factor analysis for aerosol optical depth and its prediction from the perspective of land-use change. *Ecological Indicators* **2018**, *93*, 458–469. doi:10.1016/j.ecolind.2018.05.026.
36. Sowińska-Świerkosz, B.N.; Soszyński, D. Landscape structure versus the effectiveness of nature conservation: Roztocze region case study (Poland). *Ecological Indicators* **2014**, *43*, 143–153. doi:10.1016/j.ecolind.2014.02.018.
37. Cheung, A.K.L.; Brierley, G.; O'Sullivan, D. Landscape structure and dynamics on the Qinghai-Tibetan Plateau. *Ecological Modelling* **2016**, *339*, 7–22. doi:10.1016/j.ecolmodel.2016.07.015.
38. Zhou Gong, J.; sui Liu, Y.; cheng Xia, B.; wei Zhao, G. Urban ecological security assessment and forecasting, based on a cellular automata model: A case study of Guangzhou, China. *Ecological Modelling* **2009**, *220*, 3612–3620. doi:10.1016/j.ecolmodel.2009.10.018.
39. Abadie, A.; Gobert, S.; Bonacorsi, M.; Lejeune, P.; Pergent, G.; Pergent-Martini, C. Marine space ecology and seagrasses. Does patch type matter in Posidonia oceanica seascapes? *Ecological Indicators* **2015**, *57*, 435–446. doi:10.1016/j.ecolind.2015.05.020.
40. Peringer, A.; Buttler, A.; Gillet, F.; Pătru-Stupariu, I.; Schulze, K.A.; Stupariu, M.S.; Rosenthal, G. Disturbance-grazer-vegetation interactions maintain habitat diversity in mountain pasture-woodlands. *Ecological Modelling* **2017**, *359*, 301–310. doi:10.1016/j.ecolmodel.2017.06.012.
41. Lausch, A.; Herzog, F. Applicability of landscape metrics for the monitoring of landscape change: Issues of scale, resolution and interpretability. *Ecological Indicators* **2002**, *2*, 3–15. doi:10.1016/S1470-160X(02)00053-5.
42. Pierik, M.E.; Dell'acqua, M.; Confalonieri, R.; Bocchi, S.; Gomarasca, S. Designing ecological corridors in a fragmented landscape: A fuzzy approach to circuit connectivity analysis. *Ecological Indicators* **2016**, *67*, 807–820. doi:10.1016/j.ecolind.2016.03.032.
43. Simonson, W.D.; Allen, H.D.; Coomes, D.A. Remotely sensed indicators of forest conservation status: Case study from a Natura 2000 site in southern Portugal. *Ecological Indicators* **2013**, *24*, 636–647. doi:10.1016/j.ecolind.2012.08.024.

44. Tian, G.; Ouyang, Y.; Quan, Q.; Wu, J. Simulating spatiotemporal dynamics of urbanization with multi-agent systems-A case study of the Phoenix metropolitan region, USA. *Ecological Modelling* **2011**, *222*, 1129–1138. doi:10.1016/j.ecolmodel.2010.12.018.
45. Liu, X.; Li, X.; Shi, X.; Wu, S.; Liu, T. Simulating complex urban development using kernel-based non-linear cellular automata. *Ecological Modelling* **2008**, *211*, 169–181. doi:10.1016/j.ecolmodel.2007.08.024.
46. Echeverria, C.; Coomes, D.A.; Hall, M.; Newton, A.C. Spatially explicit models to analyze forest loss and fragmentation between 1976 and 2020 in southern Chile. *Ecological Modelling* **2008**, *212*, 439–449. doi:10.1016/j.ecolmodel.2007.10.045.
47. Schindler, S.; Von Wehrden, H.; Poirazidis, K.; Wrba, T.; Kati, V. Multiscale performance of landscape metrics as indicators of species richness of plants, insects and vertebrates. *Ecological Indicators* **2013**, *31*, 41–48. doi:10.1016/j.ecolind.2012.04.012.
48. Walz, U. Indicators to monitor the structural diversity of landscapes. *Ecological Modelling* **2015**, *295*, 88–106. doi:10.1016/j.ecolmodel.2014.07.011.
49. Ruxton, G.D.; Saravia, L.A. The need for biological realism in the updating of cellular automata models. *Ecological Modelling* **1998**, *107*, 105–112. doi:10.1016/S0304-3800(97)00179-8.
50. Ramesh, T.; Kalle, R.; Downs, C.T. Sex-specific indicators of landscape use by servals: Consequences of living in fragmented landscapes. *Ecological Indicators* **2015**, *52*, 8–15. doi:10.1016/j.ecolind.2014.11.021.
51. Lustig, A.; Stouffer, D.B.; Roigé, M.; Worner, S.P. Towards more predictable and consistent landscape metrics across spatial scales. *Ecological Indicators* **2015**, *57*, 11–21. doi:10.1016/j.ecolind.2015.03.042.
52. Chan, K.M.; Vu, T.T. A landscape ecological perspective of the impacts of urbanization on urban green spaces in the Klang Valley. *Applied Geography* **2017**, *85*, 89–100. doi:10.1016/j.apgeog.2017.06.002.
53. Ray, N.; Burgman, M.A. Subjective uncertainties in habitat suitability maps. *Ecological Modelling* **2006**, *195*, 172–186. doi:10.1016/j.ecolmodel.2005.11.039.
54. Su, S.; Jiang, Z.; Zhang, Q.; Zhang, Y. Transformation of agricultural landscapes under rapid urbanization: A threat to sustainability in Hang-Jia-Hu region, China. *Applied Geography* **2011**, *31*, 439–449. doi:10.1016/j.apgeog.2010.10.008.
55. Jawarneh, R.N.; Julian, J.P. Development of an accurate fine-resolution land cover timeline: Little Rock, Arkansas, USA (1857–2006). *Applied Geography* **2012**, *35*, 104–113. doi:10.1016/j.apgeog.2012.06.006.
56. Zhang, Z.; Su, S.; Xiao, R.; Jiang, D.; Wu, J. Identifying determinants of urban growth from a multi-scale perspective: A case study of the urban agglomeration around Hangzhou Bay, China. *Applied Geography* **2013**, *45*, 193–202. doi:10.1016/j.apgeog.2013.09.013.
57. Soares, B.S.; Cerqueira, G.C.; Pennachin, C.L. DINAMICA - a stochastic cellular automata model designed to simulate the landscape dynamics in an Amazonian colonization frontier. *Ecological Modelling* **2002**, *154*, 217–235.
58. Larondelle, N.; Haase, D. Valuing post-mining landscapes using an ecosystem services approach - An example from Germany. *Ecological Indicators* **2012**, *18*, 567–574. doi:10.1016/j.ecolind.2012.01.008.
59. Simpkins, C.E.; Dennis, T.E.; Etherington, T.R.; Perry, G.L. Assessing the performance of common landscape connectivity metrics using a virtual ecologist approach. *Ecological Modelling* **2018**, *367*, 13–23. doi:10.1016/j.ecolmodel.2017.11.001.
60. Zhou, J.; Xiao, N.; Liu, L.; Li, Q. A weighted aggregation and closeness approach to measuring the compactness of landscape with multiple parts'. *Ecological Indicators* **2016**, *64*, 158–170. doi:10.1016/j.ecolind.2015.12.022.
61. Frazier, A.E.; Bagchi-Sen, S. Developing open space networks in shrinking cities. *Applied Geography* **2015**, *59*, 1–9. doi:10.1016/j.apgeog.2015.02.010.
62. Reza, M.I.H.; Abdullah, S.A. Regional Index of Ecological Integrity: A need for sustainable management of natural resources. *Ecological Indicators* **2011**, *11*, 220–229. doi:10.1016/j.ecolind.2010.08.010.
63. Fernandes, M.R.; Aguiar, F.C.; Ferreira, M.T. Assessing riparian vegetation structure and the influence of land use using landscape metrics and geostatistical tools. *Landscape and Urban Planning* **2011**, *99*, 166–177. doi:10.1016/j.landurbplan.2010.11.001.
64. Bruton, M.J.; Maron, M.; Levin, N.; McAlpine, C.A. Testing the relevance of binary, mosaic and continuous landscape conceptualisations to reptiles in regenerating dryland landscapes. *Landscape Ecology* **2015**, *30*, 715–728. doi:10.1007/s10980-015-0157-9.

65. Wheatley, M. Domains of scale in forest-landscape metrics: Implications for species-habitat modeling. *Acta Oecologica* **2010**, *36*, 259–267. doi:10.1016/j.actao.2009.12.003.
66. Haddad, N.M.; Brudvig, L.A.; Clobert, J.; Davies, K.F.; Gonzalez, A.; Holt, R.D.; Lovejoy, T.E.; Sexton, J.O.; Austin, M.P.; Collins, C.D.; Cook, W.M.; Damschen, E.I.; Ewers, R.M.; Foster, B.L.; Jenkins, C.N.; King, A.J.; Laurance, W.F.; Levey, D.J.; Margules, C.R.; Melbourne, B.A.; Nicholls, A.O.; Orrock, J.L.; Song, D.X.; Townshend, J.R. Habitat fragmentation and its lasting impact on Earth's ecosystems. *Science Advances* **2015**, *1*, 1–10. doi:10.1126/sciadv.1500052.
67. Rutledge, D. Landscape indices as measures of the effects of fragmentation : can pattern reflect process ? *DOC Science Internal Series* **2003**, pp. 1 – 27, [arXiv:1011.1669v3]. doi:10.1007/s10980-011-9650-y.
68. Li, H.; Wu, J. Use and misuse of landscape indices. *Landscape Ecology* **2004**, pp. 389–399.
69. Dunn, A.G.; Majer, J.D. In response to the continuum model for fauna research: A hierarchical, patch-based model of spatial landscape patterns. *Oikos* **2007**, *116*, 1413–1418. doi:10.1111/j.0030-1299.2007.15931.x.
70. Fortin, M.J.; Boots, B.; Csillag, F.; Rimmel, T.K. On the role of spatial stochastic models in understanding. *Oikos* **2003**, *102*, 203–212.
71. László, Z.; Dénes, A.L.; Király, L.; Tóthmérész, B. Biased parasitoid sex ratios: Wolbachia, functional traits, local and landscape effects. *Basic and Applied Ecology* **2018**, *31*, 61–71. doi:10.1016/j.baae.2018.05.014.
72. Bueno, A.S.; Peres, C.A. Patch-scale biodiversity retention in fragmented landscapes: Reconciling the habitat amount hypothesis with the island biogeography theory. *Journal of Biogeography* **2019**, *46*, 621–632. doi:10.1111/jbi.13499.
73. Cordeiro, E.M.; Macrini, C.M.; Sujii, P.S.; Schwarcz, K.D.; Pinheiro, J.B.; Rodrigues, R.R.; Brancalion, P.H.; Zucchi, M.I. Diversity, genetic structure, and population genomics of the tropical tree *Centropomus tomentosum* in remnant and restored Atlantic forests. *Conservation Genetics* **2019**, *20*, 1073–1085. doi:10.1007/s10592-019-01195-z.
74. Hernández-Martínez, J.; Morales-Malacara, J.B.; Alvarez-Anörve, M.Y.; Amador-Hernández, S.; Oyama, K.; Avila-Cabadilla, L.D. Drivers potentially influencing host-bat fly interactions in anthropogenic neotropical landscapes at different spatial scales. *Parasitology* **2019**, *146*, 74–88. doi:10.1017/S0031182018000732.
75. Dennis, M.; Scaletta, K.L.; James, P. Evaluating urban environmental and ecological landscape characteristics as a function of land-sharing-sparing, urbanity and scale. *Plos One* **2019**, *14*, e0215796. doi:10.1371/journal.pone.0215796.
76. Kurta, A.; Auteri, G.G.; Hofmann, J.E.; Mengelkoch, J.M.; White, J.P.; Whitaker, J.O.; Cooley, T.; Melotti, J. Influence of a large lake on the winter range of a small mammal: Lake Michigan and the silver-haired bat (*Lasionycteris noctivagans*). *Diversity* **2018**, *10*. doi:10.3390/d10020024.
77. Kosicki, J.Z. Are Landscape Configuration Metrics Worth Including When Predicting Specialist and Generalist Bird Species Density? A Case of the Generalised Additive Model Approach. *Environmental Modeling and Assessment* **2018**, *23*, 193–202. doi:10.1007/s10666-017-9575-1.
78. Lamamy, C.; Bombieri, G.; Zarzo-Arias, A.; González-Bernardo, E.; Penteriani, V. Can landscape characteristics help explain the different trends of Cantabrian brown bear subpopulations? *Mammal Research* **2019**, pp. 559–567. doi:10.1007/s13364-019-00440-7.
79. Ramachandran, R.M.; Roy, P.S.; Chakravarthi, V.; Sanjay, J.; Joshi, P.K. Long-term land use and land cover changes (1920–2015) in Eastern Ghats, India: Pattern of dynamics and challenges in plant species conservation. *Ecological Indicators* **2018**, *85*, 21–36. doi:10.1016/j.ecolind.2017.10.012.
80. Monti, F.; Nelli, L.; Catoni, C.; Dell'Omo, G. Nest box selection and reproduction of European Rollers in Central Italy: a 7-year study. *Avian Research* **2019**, *10*, 1–12. doi:10.1186/s40657-019-0150-0.
81. Morales-Díaz, S.P.; Alvarez-Añorve, M.Y.; Zamora-Espinoza, M.E.; Dirzo, R.; Oyama, K.; Avila-Cabadilla, L.D. Rodent community responses to vegetation and landscape changes in early successional stages of tropical dry forest. *Forest Ecology and Management* **2019**, *433*, 633–644. doi:10.1016/j.foreco.2018.11.037.
82. Lastrucci, L.; Cerri, M.; Coppi, A.; Dell'Olmo, L.; Ferranti, F.; Ferri, V.; Filippini, F.; Foggi, B.; Galardini, R.; Reale, L.; Venanzoni, R.; Viciani, D.; Gigante, D. Spatial landscape patterns and trends of declining reed-beds in peninsular Italy. *Plant Biosystems* **2019**, *153*, 427–435. doi:10.1080/11263504.2018.1498401.
83. Statuto, D.; Cillis, G.; Picuno, P. GIS-based Analysis of Temporal Evolution of Rural Landscape: A Case Study in Southern Italy. *Natural Resources Research* **2019**, *28*, 61–75. doi:10.1007/s11053-018-9402-7.

84. Colson, F.; Bogaert, J.; Filho, A.C.; Nelson, B.; Pinagé, E.R.; Ceulemans, R. The influence of forest definition on landscape fragmentation assessment in Rondônia, Brazil. *Ecological Indicators* **2009**, *9*, 1163–1168. doi:10.1016/j.ecolind.2009.02.001.
85. Aguilar, R.; Calviño, A.; Ashworth, L.; Aguirre-Acosta, N.; Carbone, L.M.; Albrieu-Llinás, G.; Nolasco, M.; Ghilardi, A.; Cagnolo, L. Unprecedented plant species loss after a decade in fragmented subtropical chaco serrano forests. *PLoS ONE* **2018**, *13*, 1–15. doi:10.1371/journal.pone.0206738.
86. Albrieu-Llinás, G.; Espinosa, M.O.; Quaglia, A.; Abril, M.; Scavuzzo, C.M. Urban environmental clustering to assess the spatial dynamics of *Aedes aegypti* breeding sites. *Geospatial Health* **2018**, *13*, 135–142. doi:10.4081/gh.2018.654.
87. Colson, F.; Bogaert, J.; Ceulemans, R. Fragmentation in the Legal Amazon, Brazil: Can landscape metrics indicate agricultural policy differences? *Ecological Indicators* **2011**, *11*, 1467–1471. doi:10.1016/j.ecolind.2010.12.020.
88. Gaucherel, C.; Burel, F.; Baudry, J. Multiscale and surface pattern analysis of the effect of landscape pattern on carabid beetles distribution. *Ecological Indicators* **2007**, *7*, 598–609. doi:10.1016/j.ecolind.2006.07.002.
89. Llauss, A.; Nogué, J. Indicators of landscape fragmentation: The case for combining ecological indices and the perceptive approach. *Ecological Indicators* **2012**, *15*, 85–91. doi:10.1016/j.ecolind.2011.08.016.
90. Tattoni, C.; Ciolli, M.; Ferretti, F. The fate of priority areas for conservation in protected areas: A fine-scale markov chain approach. *Environmental Management* **2011**, *47*, 263–278. doi:10.1007/s00267-010-9601-4.
91. Gustafson, E.J.; Parker, G.R. Relationships between landcover proportion and indices of landscape spatial pattern. *Landscape Ecology* **1992**, *7*, 101–110. doi:10.1007/BF02418941.
92. Zaragozí, B.; Belda, A.; Linares, J.; Martínez-Pérez, J.E.; Navarro, J.T.; Esparza, J. A free and open source programming library for landscape metrics calculations. *Environmental Modelling and Software* **2012**, *31*, 131–140. doi:10.1016/j.envsoft.2011.10.009.
93. Yu, M.; Huang, Y.; Cheng, X.; Tian, J. An ArcMap plug-in for calculating landscape metrics of vector data. *Ecological Informatics* **2019**, *50*, 207–219. doi:10.1016/j.ecoinf.2019.02.004.

© 2019 by the authors. Submitted to *ISPRS Int. J. Geo-Inf.* for possible open access publication under the terms and conditions of the Creative Commons Attribution (CC BY) license (<http://creativecommons.org/licenses/by/4.0/>).
