# Supplementary material
Source: MDPI journal article supplement (https://www.mdpi.com/2220-9964/8/12/586)
Supplement: s1 [file s1]

Additional material for the article:  
Relevance of the cell neighborhood size in landscape metrics evaluation and FOSS implementations, Paolo Zatelli , Stefano Gobbi, Clara Tattoni , Maria Giulia Cantiani, Nicola La Porta, Duccio Rocchini., Nicola Zorzi and Marco Ciolli.

| Title                                                                                                                                                  | Software        | Cell neighborhood | Journal                              | Patch number | Largest patch index | Mean patch | Shannon index | Simpson index | Perc landscape | Patch density | Perimeter/area | Aggregation | Euclidean dist | Total edge | Edge density | Shape index | Fractal index | Mean nearest neigh | Total |
|--------------------------------------------------------------------------------------------------------------------------------------------------------|-----------------|-------------------|--------------------------------------|--------------|---------------------|------------|---------------|---------------|----------------|---------------|----------------|-------------|----------------|------------|--------------|-------------|---------------|--------------------|-------|
| Evaluating the cooling effects of green infrastructure: A systematic review of methods, indicators and data sources                                    | FRAGSTATS       | Not specified     | Solar energy                         |              | 1                   | 1          | 1             | 1             | 1              | 1             | 1              | 1           | 1              | 1          | 1            | 1           | 1             |                    | 13    |
| Regional Index Of Ecological Integrity                                                                                                                 | FRAGSTATS/vlate | Not specified     | Ecological indicators                | 1            |                     | 1          |               |               |                | 1             |                |             |                | 1          |              | 1           |               | 1                  | 6     |
| Impact of landscape patterns on ecological vulnerability and ecosystem service values: An empirical analysis of Yancheng Nature Reserve in China       | FRAGSTATS       | Not specified     | Ecological indicators                | 1            |                     | 1          |               |               | 1              | 1             |                |             |                |            |              |             |               |                    | 4     |
| Mediterranean urban forest interface classification: a quantittative method combining SPOT5 imagery and landscape ecology indices                      | FRAGSTATS       | Not specified     | Landscape and urban planning         |              | 1                   |            | 1             |               | 1              |               |                |             |                |            |              |             |               |                    | 3     |
| Representing climate, disturbance, and vegetation interactions in landscape models                                                                     | FRAGSTATS       | Not specified     | Ecological modelling                 |              |                     |            |               |               |                |               |                |             |                |            |              |             |               |                    |       |
| The emergence of slums: A contemporary view on simulation models                                                                                       | FRAGSTATS       | Not specified     | Environmental modelling and software | 1            | 1                   |            |               |               |                |               |                |             |                |            | 1            |             |               | 1                  | 4     |
| Mapping and interpreting historical land cover/land use changes in a Natura 2000 site using earth observational data: The case of Nestos delta, Greece | FRAGSTATS       | Not specified     | Applied geography                    | 1            |                     | 1          |               |               |                |               | 1              |             |                |            | 1            |             |               |                    | 4     |
| A free and open source programming library for landscape metrics calculations                                                                          | New software    | Not specified     | Environmental modelling and software |              |                     |            |               |               |                |               |                |             |                |            |              |             |               |                    |       |
| An ArcMap plug-in for calculating landscape metrics of vector data                                                                                     | New software    | Not specified     | Ecological informatics               |              |                     |            |               |               |                |               |                |             |                |            |              |             |               |                    |       |
| Analysis of the ecological vulnerability of the western                                                                                                | ArcGIS          | Not specified     | Acta ecologica sinica                |              |                     |            |               |               |                |               |                |             |                |            |              | 1           | 1             |                    | 2     |
| Assessing riparian vegetation structure and the influence of land use using                                                                            | Not specified   | Not specified     | Landscape and urban planning         | 1            |                     | 1          |               |               |                |               |                |             |                |            |              |             | 1             | 1                  | 4     |
| Sensitivity of landscape pattern indices to input data characteristics                                                                                 | FRAGSTATS       | Not specified     | Landscape ecology                    | 1            |                     | 1          | 1             | 1             | 1              | 1             |                |             |                | 1          | 1            | 1           | 1             | 1                  | 11    |
| Beyond fragmentation the continuum model for fauna research and                                                                                        | FRAGSTATS       | (1)               | Forum                                |              |                     |            |               |               |                |               |                |             |                |            |              |             |               |                    |       |
| Testing the relevance of binary, mosaic and continuous                                                                                                 | Not specified   | Not specified     | Landscape ecology                    |              |                     | 1          | 1             |               | 1              |               |                |             |                |            |              |             |               |                    | 3     |
| Effects of thematic resolution on landscape pattern analysis                                                                                           | FRAGSTATS       | Not specified     | Landscape ecology                    |              | 1                   | 1          | 1             |               |                | 1             | 1              |             |                |            | 1            | 1           | 1             |                    | 8     |
| Detecting spatially non-stationary and scale-dependent relationships                                                                                   | FRAGSTATS       | Not specified     | Applied geography                    |              |                     |            |               |               |                |               |                | 1           |                |            | 1            |             |               |                    | 2     |
| Domains of scale in forest-landscape metrics: Implications                                                                                             | Not specified   | Not specified     | Acta oecologica                      |              |                     | 1          |               |               |                | 1             |                |             |                |            |              | 1           |               |                    | 3     |
| Effects of changing scale on landscape pattern analysis: scaling relations                                                                             | FRAGSTATS       | Not specified     | Landscape ecology                    | 1            | 1                   | 1          |               |               | 1              | 1             |                |             |                |            |              |             | 1             |                    | 6     |
| Habitat fragmentation and its lasting impact                                                                                                           | Not specified   | Not specified     | Applied ecology                      |              |                     |            |               |               |                |               |                |             |                |            |              |             |               |                    |       |
| The behavior of landscape metrics commonly used in the study of habitat                                                                                | FRAGSTATS       | (2)               | Landscape ecology                    |              |                     |            |               |               |                | 1             | 1              |             |                | 1          | 1            | 1           |               | 1                  | 6     |
| Landscape indices as measure of landscape fragmentation                                                                                                | Not specified   | (3)               | Doc science                          | 1            | 1                   | 1          | 1             |               |                | 1             |                |             |                |            |              |             |               |                    | 5     |
| Landscape indices behavior: A review of scale effects                                                                                                  | FRAGSTATS       | Not specified     | Applied geography                    | 1            | 1                   | 1          |               |               | 1              |               | 1              |             |                | 1          | 1            |             | 1             | 1                  | 9     |
| Landscape Metrics and Indices an overview on their                                                                                                     | FRAGSTATS       | Not specified     | Living review landscape research     | 1            | 1                   | 1          | 1             | 1             | 1              | 1             | 1              | 1           | 1              | 1          | 1            | 1           | 1             | 1                  | 15    |
| Use and misuse of landscape indices                                                                                                                    | Not specified   | (4)               | Landscape ecology                    |              |                     |            |               |               |                |               |                |             |                |            |              |             |               |                    |       |
| Landscape Patch Shape Complexity                                                                                                                       | FRAGSTATS       | Not specified     | Landscape ecology                    | 1            |                     | 1          |               |               |                | 1             | 1              |             |                | 1          | 1            |             | 1             |                    | 7     |
| Mapping changes to vegetation pattern in a restoring wetland Finding pattern                                                                           | FRAGSTATS       | Not specified     | Ecological indicators                | 1            |                     |            |               |               |                |               |                |             | 1              |            |              | 1           |               |                    | 3     |
| Multiscale analysis of the urbanization pattern of the Phoenix metropolitan                                                                            | FRAGSTATS       | Not specified     | Ecological indicators                | 1            | 1                   |            | 1             | 1             |                | 1             | 1              |             | 1              | 1          |              | 1           | 1             |                    | 10    |
| In response to the continuum model for fauna research                                                                                                  | Not specified   | Delauney-NN       | Olkos                                |              |                     |            |               |               |                |               |                |             | 1              | 1          |              | 1           | 1             |                    |       |
| Behavior of class-level landscape metrics across gradients of class                                                                                    | FRAGSTATS       | 8-cells           | Landscape ecology                    |              | 1                   | 1          |               |               |                | 1             |                |             |                |            | 1            | 1           |               | 1                  | 6     |
| On the role of spatial stochastic models in understanding                                                                                              | Not specified   | Not specified     | Forum                                | 1            | 1                   |            |               |               |                |               |                |             |                |            |              |             |               |                    | 2     |
| Relationship between landscape structure and burn severity at the landscape                                                                            | FRAGSTATS       | Not specified     | Forestry ecology and management      |              | 1                   | 1          | 1             |               |                | 1             |                |             |                |            |              |             |               | 1                  | 5     |
| Relationships between Landcover Proportion and Indices                                                                                                 | Hisa on fortran | Not specified     | Landscape ecology                    |              |                     | 1          |               |               |                |               |                |             |                | 1          |              |             | 1             |                    | 4     |
| Remote sensing based indicators of changes in a mountain rural landscape                                                                               | FRAGSTATS       | Not specified     | Applied geography                    | 1            | 1                   | 1          | 1             | 1             |                |               |                | 1           |                |            |              | 1           |               |                    | 7     |
| Scale dependence of landscape metrics and their indicatory                                                                                             | FRAGSTATS       | Not specified     | Ecological indicators                |              |                     | 1          |               |               |                | 1             |                | 1           |                |            | 1            |             |               | 1                  | 5     |
| Scaling functions for landscape pattern metrics derived                                                                                                | FRAGSTATS       | 8-cells           | Isprs j of photogr. And remo sensing | 1            | 1                   | 1          |               |               |                |               |                |             |                | 1          |              | 1           |               |                    | 5     |
| Evaluating empirical scaling relations of pattern metrics with                                                                                         | FRAGSTATS       | 4-cells           | Ecography                            | 1            | 1                   | 1          | 1             |               |                | 1             |                |             |                | 1          | 1            |             | 1             |                    | 8     |
| Thematic resolution matters: Indicators of landscape                                                                                                   | FRAGSTATS       | Not specified     | Ecological indicators                | 1            | 1                   | 1          | 1             | 1             | 1              | 1             | 1              | 1           | 1              | 1          | 1            | 1           | 1             | 1                  | 15    |
| Impact of an agri-environmental scheme on landscape pattern                                                                                            | FRAGSTATS       | 8-cells           | Ecological indicators                |              | 1                   | 1          |               |               |                |               |                |             |                | 1          | 1            | 1           | 1             | 1                  | 6     |
| Parsimony in landscape metrics: Strength, universality,and consistency                                                                                 | FRAGSTATS       | Not specified     | Ecological indicators                | 1            | 1                   | 1          | 1             | 1             | 1              | 1             | 1              | 1           | 1              | 1          | 1            | 1           | 1             | 1                  | 15    |
| Urban green infrastructure and local flooding: The impact of landscape patterns on peak runoff in four Texas MSAs                                      | FRAGSTATS       | Not specified     | Applied geography                    |              | 1                   | 1          | 1             |               |                |               |                | 1           |                | 1          | 1            | 1           |               | 1                  | 8     |
| An area-wide model approach for the management of a disease vector planthopper                                                                         | FRAGSTATS       | Not specified     | Ecological modelling                 |              |                     |            |               |               | 1              |               |                |             |                | 1          | 1            | 1           |               | 1                  | 2     |
| Dynamics of Utah's agricultural landscapes in response to urbanization                                                                                 | FRAGSTAT        | Not specified     | Applied geography                    | 1            |                     |            |               |               | 1              |               | 1              | 1           |                |            |              |             |               |                    | 4     |
| A gradient analysis of urban landscape pattern:                                                                                                        | FRAGSTATS       | Not specified     | Landscape ecology                    |              | 1                   | 1          |               |               | 1              | 1             |                | 1           |                |            |              | 1           |               |                    | 6     |
| Spatial analysis of landscapes: concepts and statistics                                                                                                | FRAGSTATS       | Not specified     | Ecology                              |              |                     |            |               |               |                |               |                |             |                |            |              |             |               |                    |       |
| Investigating spatiotemporal patterns of landscape diversity in response to urbanization                                                               | FRAGSTATS       | Not specified     | Landscape and urban planning         |              |                     |            | 1             |               |                |               |                |             |                |            |              |             |               |                    | 3     |
| Green space spatial characteristics and human health in an urban environmen                                                                            | FRAGSTATS       | Not specified     | Ecological indicators                | 1            |                     | 1          | 1             |               |                |               |                |             |                |            | 1            |             |               | 1                  | 5     |
| Factor analysis for aerosol optical depth and its prediction from the perspective of land-use change                                                   | FRAGSTATS       | Not specified     | Ecological indicators                |              | 1                   |            | 1             |               | 1              | 1             |                |             |                |            | 1            | 1           |               |                    | 6     |
| Landscape structure versus the effectiveness of nature conservation: Roztocze region case study                                                        | FRAGSTATS       | Not specified     | Ecological indicators                | 1            |                     | 1          |               |               |                | 1             |                |             |                | 1          | 1            | 1           |               | 1                  | 7     |
| Landscape structure and dynamics on the Qinghai-Tibetan Plateau                                                                                        | FRAGSTATS       | Not specified     | Ecological modelling                 | 1            |                     | 1          |               |               | 1              |               |                |             |                |            | 1            |             |               |                    | 4     |
| Urban ecological security assessment and forecasting, based on a cellular automata model: A case study of Guangzhou, China                             | FRAGSTATS       | 8-cells           | Ecological modelling                 | 1            |                     |            |               | 1             | 1              | 1             |                | 1           |                |            |              |             | 1             |                    | 6     |
| Marine space ecology and sea grasses. Does patch type matter in Posidonia oceanica seascapes?                                                          | FRAGSTATS       | 8-cells           | Ecological indicators                | 1            |                     | 1          | 1             |               |                | 1             | 1              |             | 1              |            |              |             |               |                    | 6     |
| Disturbance-grazer-vegetation interactions maintain habitat diversity in mountain pasture-woodlands                                                    | FRAGSTATS       | Not specified     | Ecological modelling                 |              |                     |            | 1             |               |                | 1             |                |             |                |            | 1            |             |               |                    | 3     |
| Applicability of landscape metrics for the monitoring of landscape change: Issues of scale, resolution and interpretability                            | FRAGSTATS       | 8-cells           | Ecological indicators                | 1            | 1                   | 1          | 1             | 1             |                |               |                |             |                |            | 1            | 1           |               |                    | 7     |
| Designing ecological corridors in a fragmented landscape: A fuzzy approach to circuit connectivity analysis                                            | FRAGSTATS       | Not specified     | Ecological indicators                |              |                     | 1          | 1             | 1             |                |               |                | 1           | 1              |            |              |             |               |                    | 4     |
| Remotely sensed indicators of forest conservation status: Case study from a Natura 2000 site in southern Portugal                                      | FRAGSTATS       | Not specified     | Ecological indicators                |              |                     |            |               |               |                |               |                | 1           |                |            |              |             |               |                    | 3     |
| Simulating spatiotemporal dynamics of urbanization with multi-agentsystems—A case study of the Phoenix metropolitan region, USA                        | FRAGSTATS       | Not specified     | Ecological modelling                 | 1            |                     | 1          |               |               |                |               |                |             |                |            | 1            |             | 1             |                    | 4     |
| Simulating complex urban development using kernel-based non-linear cellular automata                                                                   | FRAGSTATS       | Not specified     | Ecological modelling                 | 1            | 1                   |            |               |               |                |               |                |             |                | 1          | 1            | 1           |               | 1                  | 5     |
| Spatially explicit models to analyze forest loss and fragmentation between 1976 and 2020 in southern Chile                                             | FRAGSTATS       | Not specified     | Ecological modelling                 |              |                     | 1          |               |               |                |               |                |             |                |            | 1            | 1           |               | 1                  | 2     |
| Multiscale performance of landscape metrics as indicators of species richness of plants, insects and vertebrates                                       | FRAGSTATS       | Not specified     | Ecological indicators                |              | 1                   | 1          | 1             | 1             | 1              | 1             | 1              | 1           |                |            | 1            | 1           | 1             | 1                  | 12    |
| Indicators to monitor the structural diversity of landscapes                                                                                           | FRAGSTATS       | Not specified     | Ecological modelling                 |              |                     | 1          | 1             |               |                |               |                | 1           | 1              |            |              | 1           |               | 1                  | 5     |
| The need for biological realism in the updating of cellular automata models                                                                            | FRAGSTATS       | Not specified     | Ecological modelling                 | 1            | 1                   |            |               |               |                |               |                |             |                |            |              |             | 1             |                    | 3     |
| Sex-specific indicators of landscape use by servals                                                                                                    | FRAGSTATS       | 8-cells           | Ecological indicators                |              |                     | 1          |               |               |                |               |                |             | 1              |            |              | 1           |               |                    | 3     |
| Towards more predictable and consistent landscape metrics across                                                                                       | FRAGSTATS       | 8-cells           | Ecological indicators                | 1            | 1                   | 1          | 1             | 1             | 1              | 1             | 1              | 1           | 1              | 1          | 1            | 1           | 1             | 1                  | 15    |
| A landscape ecological perspective of the impacts of urbanization on                                                                                   | FRAGSTATS       | Not specified     | Applied geography                    | 1            | 1                   |            |               |               | 1              | 1             |                |             |                |            | 1            | 1           |               |                    | 6     |
| Subjective uncertainties in habitat suitability maps                                                                                                   | FRAGSTATS       | Not specified     | Ecological modelling                 | 1            |                     |            |               |               |                |               |                |             | 1              |            |              |             |               |                    | 2     |
| Transformation of agricultural landscapes under rapid urbanization                                                                                     | FRAGSTATS       | Not specified     | Applied geography                    |              |                     |            |               |               | 1              | 1             | 1              | 1           |                |            |              |             |               |                    | 4     |
| Development of an accurate fine-resolution land cover timeline                                                                                         | FRAGSTATS       | Not specified     | Applied geography                    |              |                     | 1          |               |               |                |               |                |             |                |            |              |             |               |                    | 1     |
| Identifying determinants of urban growth from a multi-scale                                                                                            | FRAGSTATS       | Not specified     | Applied geography                    |              |                     |            |               |               | 1              |               |                | 1           |                | 1          |              | 1           |               |                    | 4     |
| DINAMICA — a stochastic cellular automata model designed                                                                                               | FRAGSTATS       | Not specified     | Ecological modelling                 | 1            | 1                   | 1          | 1             | 1             | 1              | 1             | 1              | 1           | 1              | 1          | 1            | 1           | 1             | 1                  | 15    |
| Valuing post-mining landscapes using an ecosystem services approach                                                                                    | FRAGSTATS       | Not specified     | Ecological indicators                |              |                     | 1          |               |               |                |               |                |             |                | 1          |              |             |               |                    | 2     |
| Assessing the performance of common landscape connectivity                                                                                             | FRAGSTATS       | Not specified     | Landscape and urban planning         | 1            |                     | 1          |               |               |                |               |                |             |                |            |              |             | 1             | 1                  | 4     |
| A weighted aggregation and closeness approach to measuring the                                                                                         | FRAGSTATS       | Not specified     | Ecological indicators                | 1            |                     | 1          |               |               |                |               | 1              |             |                | 1          |              | 1           | 1             |                    | 6     |
| Developing open space networks in shrinking cities                                                                                                     | FRAGSTATS       | Not specified     | Applied geography                    | 1            |                     | 1          |               |               | 1              | 1             |                |             |                |            |              |             |               |                    | 4     |
| Fragmentation in the Legal Amazon, Brazil Can landscape metrics indicate                                                                               | r.le            | Not specified     | Ecological indicators                | 1            | 1                   | 1          |               |               |                |               | 1              |             |                |            | 1            | 1           |               |                    | 6     |
| Biased parasitoids ex ratios Wolbachia functional traits                                                                                               | lecos           | Not specified     | Basic and applied ecology            | 1            |                     | 1          |               |               |                |               |                |             |                | 1          |              | 1           |               |                    | 3     |
| Patch-scale biodiversity retention in fragmented landscapes                                                                                            | lecos           | Not specified     | Journal of biogeography              |              | 1                   | 1          |               |               | 1              |               |                |             |                |            |              |             |               |                    | 3     |
| Diversity, genetic structure, and population genomics of the tropica                                                                                   | lecos           | Not specified     | Conservation genetics                | 1            |                     |            | 1             |               | 1              |               |                |             |                |            |              |             |               |                    | 3     |
| Drivers potentially influencing hostbat fly interactions in anthropogenic neotropical landscapes at different spatial scales                           | lecos           | Not specified     | Parasitology                         |              |                     |            | 1             | 1             |                |               |                |             |                |            |              |             |               |                    | 2     |
| Evaluating urban environmental and                                                                                                                     | lecos           | Not specified     | Plosone                              |              | 1                   |            | 1             |               |                |               |                | 1           |                |            |              |             |               |                    | 3     |
| Influence of a Large Lake on the Winter Range of a                                                                                                     | lecos           | Not specified     | Diversity                            | 1            |                     | 1          |               |               |                |               |                |             |                |            |              |             |               |                    | 2     |
| Are Landscape Configuration Metrics Worth Including When                                                                                               | lecos           | Not specified     | Environmental model assessment       | 1            |                     |            |               |               | 1              |               |                |             |                |            |              | 1           |               |                    | 3     |
| Can landscape characteristics help explain the different trends                                                                                        | lecos           | Not specified     | Mammal research                      | 1            | 1                   | 1          | 1             | 1             |                |               |                |             |                |            | 1            |             |               | 1                  | 7     |
| Long-term land use and land cover changes (1920-2015) in Eastern Ghats                                                                                 | lecos           | Not specified     | Ecological indicators                | 1            | 1                   |            | 1             | 1             |                |               |                |             |                | 1          |              |             |               |                    | 6     |
| Multiscale and surface pattern analysis of the effect of                                                                                               | r.le            | Not specified     | Ecological indicators                |              |                     |            |               |               |                |               |                | 1           |                |            | 1            |             |               |                    | 2     |
| Indicators of landscape fragmentation The case for combining ecological indices                                                                        | r.le            | Not specified     | Ecological indicators                | 1            |                     | 1          | 1             | 1             |                |               |                |             | 1              | 1          |              |             |               |                    | 6     |
| Nest box selection                                                                                                                                     | lecos           | Not specified     | Avian research                       | 1            |                     | 1          | 1             |               |                |               | 1              |             |                | 1          |              |             |               |                    | 5     |
| Rodent community responses to vegetation and landscape changes                                                                                         | lecos           | Not specified     | Forest ecology and managment         |              |                     |            | 1             |               |                |               |                |             |                |            |              |             |               |                    | 2     |
| Spatial landscape patterns and trends of declining reed beds in peninsular Italy                                                                       | lecos           | Not specified     | Plants biosystems                    |              |                     |            |               |               | 1              |               |                |             |                |            | 1            |             |               |                    | 2     |
| GIS-based Analysis of Temporal Evolution of Rural Land                                                                                                 | lecos           | Not specified     | Natural resources research           | 1            |                     |            | 1             | 1             |                | 1             |                |             |                |            | 1            |             |               |                    | 5     |
| The influence of forest definition on landscape fragmentation assessment                                                                               | lecos           | Not specified     | Ecological indicators                | 1            | 1                   | 1          |               |               |                |               | 1              |             |                | 1          |              |             |               |                    | 5     |
| Unprecedented plant species loss after a                                                                                                               | lecos           | Not specified     | Plosone                              |              |                     | 1          |               |               | 1              |               |                |             |                |            |              |             |               |                    | 2     |
| Urban environmental clustering to assess the spatial dynamics of Aedes aegypti breeding sites                                                          | lecos           | Not specified     | Geospatial health                    |              |                     |            | 1             |               |                |               |                |             |                |            |              |             |               |                    | 2     |
| The Fate of Priority Areas for Conservation in Protected Areas: A Fine-Scale Markov Chain Approach                                                     | r.le            | Not specified     | Environmental Management             | 1            | 1                   | 1          | 1             |               |                |               |                |             |                | 1          |              |             |               |                    | 5     |
| Notes                                                                                                                                                  |                 |                   | Total citations [number]             | 47           | 34                  | 51         | 35            | 18            | 28             | 31            | 20             | 21          | 14             | 27         | 34           | 32          | 22            | 25                 | 446   |
| (1) The definition of Cell Neighborhood is not important.                                                                                              |                 |                   | Total citations [%]                  | 51.1         | 37.0                | 55.4       | 38.0          | 19.6          | 30.4           | 33.7          | 21.7           | 22.8        | 15.2           | 29.3       | 37.0         | 34.8        | 23.9          | 27.2               |       |
| (2) Discusses different configurations of moving window options.                                                                                       |                 |                   |                                      |              |                     |            |               |               |                |               |                |             |                |            |              |             |               |                    |       |
| (3) List of metrics, specify how CN definition influences the results.                                                                                 |                 |                   |                                      |              |                     |            |               |               |                |               |                |             |                |            |              |             |               |                    |       |
| (4) Review, highlight the fact that often parameters needed for the interpretation of the results are not reported.                                    |                 |                   |                                      |              |                     |            |               |               |                |               |                |             |                |            |              |             |               |                    |       |

| Software usage per article | FRAGSTATS | LeCos | r.le | other |
|----------------------------|-----------|-------|------|-------|
| Use in absolute value      | 70        | 16    | 4    | 3     |
| Use in %                   | 65.1      | 14.9  | 3.7  | 2.8   |

See Landscape\_metrics\_literature\_review.pdf for complete references.
